# Supplementary material for: Association of PET‐based stages of amyloid deposition with neuropathological markers of Aβ pathology
Source: PubMed Central journal article supplement — Ann Clin Transl Neurol. 2020 Nov 2;8(1):29–42. doi: 10.1002/acn3.51238 (PMC7818279; doi:10.1002/acn3.51238), 2020-11-02

## ACKNOWLEDGEMENT LIST FOR ADNI PUBLICATIONS

The Data and Publications Committee, in keeping with the publication policies adopted by the ADNI Steering Committee, here provide lists for standardized acknowledgement. The list consists of three parts: I. ADNI Infrastructure Investigators and Site Investigators, II. DOD ADNI Infrastructure Investigators and Site Investigators and III. ADNI Depression Infrastructure Investigators and Site Investigators. Infrastructure Investigators represent the names responsible for leadership and infrastructure. Site Investigators represent the names of individuals at each recruiting site. All papers, including methodological papers, should have an acknowledgement list that consists of Infrastructure Investigators plus the FULL list.

### I. ADNI I, GO, II and III

#### Part A: Leadership and Infrastructure

##### **Principal Investigator**

Michael W. Weiner, MD UC San Francisco

##### **ATRI PI and Director of Coordinating Center Clinical Core**

Paul Aisen, MD University of Southern California

##### **Executive Committee**

|                             |                                                     |
|-----------------------------|-----------------------------------------------------|
| Michael Weiner, MD          | UC San Francisco                                    |
| Paul Aisen, MD              | University of Southern California                   |
| Ronald Petersen, MD, PhD    | Mayo Clinic, Rochester                              |
| Clifford R. Jack, Jr., MD   | Mayo Clinic, Rochester                              |
| William Jagust, MD          | UC Berkeley                                         |
| John Q. Trojanowki, MD, PhD | U Pennsylvania                                      |
| Arthur W. Toga, PhD         | USC                                                 |
| Laurel Beckett, PhD         | UC Davis                                            |
| Robert C. Green, MD, MPH    | Brigham and Women's Hospital/Harvard Medical School |
| Andrew J. Saykin, PsyD      | Indiana University                                  |
| John Morris, MD             | Washington University St. Louis                     |
| Leslie M. Shaw              | University of Pennsylvania                          |

##### **ADNI External Advisory Board (ESAB)**

|                         |                                                           |
|-------------------------|-----------------------------------------------------------|
| Zaven Khachaturian, PhD | Prevent Alzheimer's Disease 2020 (Chair)                  |
| Greg Sorensen, MD       | Siemens                                                   |
| Maria Carrillo, PhD     | Alzheimer's Association                                   |
| Lew Kuller, MD          | University of Pittsburgh                                  |
| Marc Raichle, MD        | Washington University St. Louis                           |
| Steven Paul, MD         | Cornell University                                        |
| Peter Davies, MD        | Albert Einstein College of Medicine of Yeshiva University |
| Howard Fillit, MD       | AD Drug Discovery Foundation                              |
| Franz Hefti, PhD        | Acumen Pharmaceuticals                                    |
| David Holtzman, MD      | Washington University St. Louis                           |
| M. Marcel Mesulam, MD   | Northwestern University                                   |
| William Potter, MD      | National Institute of Mental Health                       |
| Peter Snyder, PhD       | Brown University                                          |

##### **ADNI 3 Private Partner Scientific Board (PPSB)**

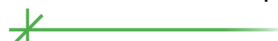

Eli Lilly (Chair)

**Data and Publications Committee**

Robert C. Green, MD, MPH

BWH/HMS (Chair)

**Resource Allocation Review Committee**

Tom Montine, MD, PhD

University of Washington (Chair)

**Clinical Core Leaders**

Ronald Petersen, MD, PhD

Mayo Clinic, Rochester (Core PI)

Paul Aisen, MD

University of Southern California

**Clinical Informatics and Operations**

Gustavo Jimenez, MBS

USC

Michael Donohue, PhD

USC

Devon Gessert, BS

USC

Kelly Harless, BA

USC

Jennifer Salazar, MBS

USC

Yuliana Cabrera, BS

USC

Sarah Walter, MSc

USC

Lindsey Hergesheimer, BS

USC

**Biostatistics Core Leaders and Key Personnel**

Laurel Beckett, PhD

UC Davis (Core PI)

Danielle Harvey, PhD

UC Davis

Michael Donohue, PhD

UC San Diego

**MRI Core Leaders and Key Personnel**

Clifford R. Jack, Jr., MD

Mayo Clinic, Rochester (Core PI)

Matthew Bernstein, PhD

Mayo Clinic, Rochester

Nick Fox, MD

University of London

Paul Thompson, PhD

UCLA School of Medicine

Norbert Schuff, PhD

UCSF MRI

Charles DeCarli, MD

UC Davis

Bret Borowski, RT

Mayo Clinic

Jeff Gunter, PhD

Mayo Clinic

Matt Senjem, MS

Mayo Clinic

Prashanthi Vemuri, PhD

Mayo Clinic

David Jones, MD

Mayo Clinic

Kejal Kantarci

Mayo Clinic

Chad Ward

Mayo Clinic

**PET Core Leaders and Key Personnel**

William Jagust, MD

UC Berkeley (Core PI)

Robert A. Koeppe, PhD

University of Michigan

Norm Foster, MD

University of Utah

Eric M. Reiman, MD

Banner Alzheimer's Institute

Kewei Chen, PhD

Banner Alzheimer's Institute

Chet Mathis, MD

University of Pittsburgh

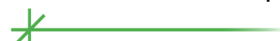

**Neuropathology Core Leaders**

|                                                             |                                 |
|-------------------------------------------------------------|---------------------------------|
| John C. Morris, MD                                          | Washington University St. Louis |
| Nigel J. Cairns, PhD, FRCPath                               | Washington University St. Louis |
| Erin Franklin, MS, CCRP                                     | Washington University St. Louis |
| Lisa Taylor-Reinwald, BA, HTL<br>(ASCP) – Past Investigator | Washington University St. Louis |

**Biomarkers Core Leaders and Key Personnel**

|                             |                          |
|-----------------------------|--------------------------|
| Leslie M. Shaw, PhD         | UPenn School of Medicine |
| John Q. Trojanowki, MD, PhD | UPenn School of Medicine |
| Virginia Lee, PhD, MBA      | UPenn School of Medicine |
| Magdalena Korecka, PhD      | UPenn School of Medicine |
| Michal Figurski, PhD        | UPenn School of Medicine |

**Informatics Core Leaders and Key Personnel**

|                     |               |
|---------------------|---------------|
| Arthur W. Toga, PhD | USC (Core PI) |
| Karen Crawford      | USC           |
| Scott Neu, PhD      | USC           |

**Genetics Core Leaders and Key Personnel**

|                        |                    |
|------------------------|--------------------|
| Andrew J. Saykin, PsyD | Indiana University |
| Tatiana M. Foroud, PhD | Indiana University |
| Steven Potkin, MD UC   | UC Irvine          |
| Li Shen, PhD           | Indiana University |
| Kelley Faber, MS, CCRC | Indiana University |
| Sungeun Kim, PhD       | Indiana University |
| Kwangsik Nho, PhD      | Indiana University |

**Initial Concept Planning & Development**

|                         |                                  |
|-------------------------|----------------------------------|
| Michael W. Weiner, MD   | UC San Francisco                 |
| Lean Thal, MD           | UC San Diego                     |
| Zaven Khachaturian, PhD | Prevent Alzheimer's Disease 2020 |

**Early Project Proposal Development**

|                         |                                     |
|-------------------------|-------------------------------------|
| Leon Thal, MD           | UC San Diego                        |
| Neil Buckholtz          | National Institute on Aging         |
| Michael W. Weiner, MD   | UC San Francisco                    |
| Peter J. Snyder, PhD    | Brown University                    |
| William Potter, MD      | National Institute of Mental Health |
| Steven Paul, MD         | Cornell University                  |
| Marilyn Albert, PhD     | Johns Hopkins University            |
| Richard Frank, MD, PhD  | Richard Frank Consulting            |
| Zaven Khachaturian, PhD | Prevent Alzheimer's Disease 2020    |

**NIA**

|                |                             |
|----------------|-----------------------------|
| John Hsiao, MD | National Institute on Aging |
|----------------|-----------------------------|



**Part B: Investigators By Site****Oregon Health & Science University:**

Joseph Quinn, MD  
Lisa C. Silbert, MD  
Betty Lind, BS  
Jeffrey A. Kaye, MD, A. – Past Investigator  
Raina Carter, BA – Past Investigator  
Sara Dolen, BS – Past Investigator

**University of Southern California:**

Lon S. Schneider, MD  
Sonia Pawluczyk, MD  
Mauricio Becerra, BS  
Liberty Teodoro, RN  
Bryan M. Spann, DO, PhD – Past Investigator

**University of California – San Diego:**

James Brewer, MD, PhD  
Helen Vanderswag, RN  
Adam Fleisher, MD – Past Investigator

**University of Michigan:**

Jaimie Ziolkowski, MA, BS, TLLP  
Judith L. Heidebrink, MD, MS  
Joanne L. Lord, LPN, BA, CCRC – Past Investigator

**Mayo Clinic, Rochester:**

Ronald Petersen, MD, PhD  
Sara S. Mason, RN  
Colleen S. Albers, RN  
David Knopman, MD  
Kris Johnson, RN – Past Investigator

**Baylor College of Medicine:**

Javier Villanueva-Meyer, MD  
Valory Pavlik, PhD  
Nathaniel Pacini, MA  
Ashley Lamb, MA  
Joseph S. Kass, MD, LD, FAAN  
Rachelle S. Doody, MD, PhD – Past Investigator  
Victoria Shibley, MS – Past Investigator  
Munir Chowdhury, MBBS, MS – Past Investigator  
Susan Rountree, MD – Past Investigator  
Mimi Dang, MD – Past Investigator

**Columbia University Medical Center:**

Yaakov Stern, PhD  
Lawrence S. Honig, MD, PhD  
Karen L. Bell, MD  
Randy Yeh, MD

**Washington University, St. Louis:**

Beau Ances, MD, PhD, MSc  
John C. Morris, MD  
David Winkfield, BS  
Maria Carroll, RN, MSN, GCNS-BC  
Angela Oliver, RN, BSN, MSG  
Mary L. Creech, RN, MSW – Past Investigator  
Mark A. Mintun, MD – Past Investigator  
Stacy Schneider, APRN, BC, GNP – Past Investigator

**University of Alabama - Birmingham:**

Daniel Marson, JD, PhD  
David Geldmacher, MD  
Marissa Natelson Love, MD  
Randall Griffith, PhD, ABPP – Past Investigator  
David Clark, MD – Past Investigator  
John Brockington, MD – Past Investigator

**Mount Sinai School of Medicine:**

Hillel Grossman, MD  
Effie Mitsis, PhD – Past Investigator

**Rush University Medical Center:**

Raj C. Shah, MD  
Melissa Lamar, PhD  
Patricia Samuels

**Wien Center:**

Ranjan Duara, MD  
Maria T. Greig-Custo, MD  
Rosemarie Rodriguez, PhD

**Johns Hopkins University:**

Marilyn Albert, PhD  
Chiadi Onyike, MD  
Daniel D'Agostino II, BS  
Stephanie Kielb, BS – Past Investigator

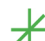

**New York University:**

Martin Sadowski, MD, PhD  
Mohammed O. Sheikh, MD  
Jamika Singleton-Garvin, CCRP  
Anasztasia Ulysse  
Mrunalini Gaikwad

**Duke University Medical Center:**

P. Murali Doraiswamy, MBBS, FRCP  
Jeffrey R. Petrella, MD  
Olga James, MD  
Salvador Borges-Neto, MD  
Terence Z. Wong, MD – Past Investigator  
Edward Coleman – Past Investigator

**University of Pennsylvania:**

Jason H. Karlawish, MD  
David A. Wolk, MD  
Sanjeev Vaishnavi, MD  
Christopher M. Clark, MD – Past Investigator  
Steven E. Arnold, MD – Past Investigator

**University of Kentucky:**

Charles D. Smith, MD  
Greg Jicha, MD  
Peter Hardy, PhD  
Riham El Khouli, MD  
Elizabeth Oates, MD  
Gary Conrad, MD

**University of Pittsburgh:**

Oscar L. Lopez, MD  
MaryAnn Oakley, MA  
Donna M. Simpson, CRNP, MPH

**University of Rochester Medical Center:**

Anton P. Porsteinsson, MD  
Kim Martin, RN  
Nancy Kowalksi, MS, RNC  
Melanie Keltz, RN  
Bonnie S. Goldstein, MS, NP – Past Investigator  
Kelly M. Makino, BS – Past Investigator  
M. Saleem Ismail, MD – Past Investigator  
Connie Brand, RN – Past Investigator

**University of California Irvine IMIND:**

Gaby Thai, MD  
Aimee Pierce, MD  
Beatriz Yanez, RN  
Elizabeth Sosa, PhD

Megan Witbracht, PhD

**University of Texas Southwestern Medical School:**

Kyle Womack, MD  
Dana Mathews, MD, PhD  
Mary Quiceno, MD

**Emory University:**

Allan I. Levey, MD, PhD  
James J. Lah, MD, PhD  
Janet S. Cellar, DNP, PMHCNS-BC

**University of Kansas, Medical Center:**

Jeffrey M. Burns, MD  
Russell H. Swerdlow, MD  
William M. Brooks, PhD

**University of California, Los Angeles:**

Ellen Woo, PhD  
Daniel H.S. Silverman, MD, PhD  
Edmond Teng, MD, PhD  
Sarah Kremen, MD  
Liana Apostolova, MD – Past Investigator  
Kathleen Tingus, PhD – Past Investigator  
Po H. Lu, PsyD – Past Investigator  
George Bartzokis, MD – Past Investigator

**Mayo Clinic, Jacksonville:**

Neill R Graff-Radford, MBBCH, FRCP (London)  
Francine Parfitt, MSH, CCRC  
Kim Poki-Walker, BA

**Indiana University:**

Martin R. Farlow, MD  
Ann Marie Hake, MD  
Brandy R. Matthews, MD – Past Investigator  
Jared R. Brosch, MD  
Scott Herring, RN, CCRC

**Yale University School of Medicine:**

Christopher H. van Dyck, MD  
Richard E. Carson, PhD  
Pradeep Varma, MD

**McGill Univ., Montreal-Jewish General Hospital:**

Howard Chertkow, MD  
Howard Bergman, MD  
Chris Hosein, MEd



**Sunnybrook Health Sciences, Ontario:**

Sandra Black, MD, FRCPC  
Bojana Stefanovic, PhD  
Chris (Chinthaka) Heyn, BSc, PhD, MD, FRCPC

**U.B.C. Clinic for AD & Related Disorders:**

Ging-Yuek Robin Hsiung, MD, MHSc, FRCPC  
Benita Mudge, BS  
Vesna Sossi, PhD  
Howard Feldman, MD, FRCPC – Past Investigator  
Michele Assaly, MA – Past Investigator

**Cognitive Neurology - St. Joseph's, Ontario:**

Elizabeth Finger, MD  
Stephen Pasternack, MD, PhD  
William Pavlosky, MD  
Irina Rachinsky, MD – Past Investigator  
Dick Drost, PhD – Past Investigator  
Andrew Kertesz, MD – Past Investigator

**Cleveland Clinic Lou Ruvo Center for Brain Health:**

Charles Bernick, MD, MPH  
Donna Munic, PhD

**Northwestern University:**

Marek-Marsel Mesulam, MD  
Emily Rogalski, PhD  
Kristine Lipowski, MA  
Sandra Weintraub, PhD  
Borna Bonakdarpour, MD  
Diana Kerwin, MD – Past Investigator  
Chuang-Kuo Wu, MD, PhD – Past Investigator  
Nancy Johnson, PhD – Past Investigator

**Premiere Research Inst (Palm Beach Neurology):**

Carl Sadowsky, MD  
Teresa Villena, MD

**Georgetown University Medical Center:**

Raymond Scott Turner, MD, PhD  
Kathleen Johnson, NP  
Brigid Reynolds, NP

**Brigham and Women's Hospital:**

Reisa A. Sperling, MD  
Keith A. Johnson, MD  
Gad A. Marshall, MD

**Stanford University:**

Jerome Yesavage, MD  
Joy L. Taylor, PhD  
Steven Chao, MD, PhD  
Barton Lane, MD – Past Investigator  
Allyson Rosen, PhD – Past Investigator  
Jared Tinklenberg, MD – Past Investigator

**Banner Sun Health Research Institute:**

Edward Zamrini, MD  
Christine M. Belden, PsyD  
Sherye A. Sirrel, CCRC

**Boston University:**

Neil Kowall, MD  
Ronald Killiany, PhD  
Andrew E. Budson, MD  
Alexander Norbash, MD – Past Investigator  
Patricia Lynn Johnson, BA – Past Investigator

**Howard University:**

Thomas O. Obisesan, MD, MPH  
Ntekim E. Oyonumo, MD, PhD  
Joanne Allard, PhD  
Olu Ogunlana, BPharm

**Case Western Reserve University:**

Alan Lerner, MD  
Paula Ogrocki, PhD  
Curtis Tatsuoka, PhD  
Pariante Fatica, BA, CCRC

**University of California, Davis – Sacramento:**

Evan Fletcher, PhD  
Pauline Maillard, PhD  
John Olichney, MD  
Charles DeCarli, MD  
Owen Carmichael, PhD – Past Investigator

**Neurological Care of CNY:**

Smita Kittur, MD – Past Investigator

**Parkwood Institute:**

Michael Borrie, MB ChB  
T-Y Lee, PhD  
Dr Rob Bartha, PhD

**University of Wisconsin:**

Sterling Johnson, PhD  
Sanjay Asthana, MD

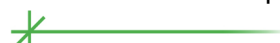

Cynthia M. Carlsson, MD, MS

**Banner Alzheimer's Institute:**

Pierre Tariot, MD  
Anna Burke, MD  
Joel Hetelle, BS  
Kathryn DeMarco, BS  
Nadira Trncic, MD, PhD, CCRC – Past Investigator  
Adam Fleisher, MD – Past Investigator  
Stephanie Reeder, BA – Past Investigator

**Dent Neurologic Institute:**

Vernice Bates, MD  
Horacio Capote, MD  
Michelle Rainka, PharmD, CCRP

**Ohio State University:**

Douglas W. Scharre, MD  
Maria Kataki, MD, PhD  
Rawan Tarawneh, MD

**Albany Medical College:**

Earl A. Zimmerman, MD  
Dzintra Celmins, MD  
David Hart, MD

**Hartford Hospital, Olin Neuropsychiatry**

**Research Center:**

Godfrey D. Pearlson, MD  
Karen Blank, MD  
Karen Anderson, RN

**Dartmouth-Hitchcock Medical Center:**

Laura A. Flashman, PhD  
Marc Seltzer, MD  
Mary L. Hynes, RN, MPH  
Robert B. Santulli, MD – Past Investigator

**Wake Forest University Health Sciences:**

Kaycee M. Sink, MD, MAS  
Mia Yang, MD  
Akiva Mintz, MD, PhD

**Rhode Island Hospital:**

Brian R. Ott, MD  
Geoffrey Tremont, PhD  
Lori A. Daiello, Pharm.D, ScM

**Butler Hospital:**

Courtney Bodge, PhD

Stephen Salloway, MD, MS  
Paul Malloy, PhD  
Stephen Correia, PhD  
Athena Lee, PhD

**UC San Francisco:**

Howard J. Rosen, MD  
Bruce L. Miller, MD  
David Perry, MD

**Medical University South Carolina:**

Jacobo Mintzer, MD, MBA  
Kenneth Spicer, MD, PhD  
David Bachman, MD

**St. Joseph's Health Care:**

Elizabeth Finger, MD  
Stephen Pasternak, MD  
Irina Rachinsky, MD  
John Rogers, MD  
Andrew Kertesz, MD – Past Investigator  
Dick Drost, MD – Past Investigator

**Nathan Kline Institute**

Nunzio Pomara, MD  
Raymundo Hernando, MD  
Antero Sarrael, MD

**University of Iowa College of Medicine**

Delwyn D. Miller, PharmD, MD  
Karen Ekstam Smith, RN  
Hristina Koleva, MD  
Ki Won Nam, MD  
Hyungsub Shim, MD  
Susan K. Schultz, MD – Past Investigator

**Cornell University**

Norman Relkin, MD, PhD  
Gloria Chiang, MD  
Michael Lin, MD  
Lisa Ravdin, PhD

**University of South Florida: USF Health Byrd  
Alzheimer's Institute**

Amanda Smith, MD  
Christi Leach, MD  
Balebail Ashok Raj, MD – Past Investigator  
Kristin Fargher, MD – Past Investigator



## **DOD ADNI**

### **Part A: Leadership and Infrastructure**

#### **Principal Investigator**

Michael W. Weiner, MD University of California, San Francisco

#### **ATRI PI and Director of Coordinating Center Clinical Core**

Paul Aisen, MD University of Southern California

#### **Executive Committee**

|                             |                                                         |
|-----------------------------|---------------------------------------------------------|
| Michael Weiner, MD          | UC San Francisco                                        |
| Paul Aisen, MD              | University of Southern California                       |
| Ronald Petersen, MD, PhD    | Mayo Clinic, Rochester                                  |
| Robert C. Green, MD, MPH    | Brigham and Women's Hospital/<br>Harvard Medical School |
| Danielle Harvey, PhD        | UC Davis                                                |
| Clifford R. Jack, Jr., MD   | Mayo Clinic, Rochester                                  |
| William Jagust, MD          | UC Berkeley                                             |
| John C. Morris, MD          | Washington University St. Louis                         |
| Andrew J. Saykin, PsyD      | Indiana University                                      |
| Leslie M. Shaw, PhD         | Perelman School of Medicine, UPenn                      |
| Arthur W. Toga, PhD         | USC                                                     |
| John Q. Trojanowki, MD, PhD | Perelman School of Medicine, University of Pennsylvania |

#### **Psychological Evaluation/PTSD Core**

Thomas Neylan, MD UC San Francisco

#### **Traumatic Brain Injury/TBI Core**

Jordan Grafman, PhD Rehabilitation Institute of Chicago, Feinberg School of Medicine,  
Northwestern University

#### **Data and Publication Committee (DPC)**

Robert C. Green, MD, MPH BWH/HMS (Chair)

#### **Resource Allocation Review Committee**

Tom Montine, MD, PhD University of Washington (Chair)

#### **Clinical Core Leaders**

|                          |                                   |
|--------------------------|-----------------------------------|
| Michael Weiner MD        | Core PI                           |
| Ronald Petersen, MD, PhD | Mayo Clinic, Rochester (Core PI)  |
| Paul Aisen, MD           | University of Southern California |

#### **Clinical Informatics and Operations**

|                      |     |
|----------------------|-----|
| Gustavo Jimenez, MBS | USC |
| Michael Donohue, PhD | USC |
| Devon Gessert, BS    | USC |





|                       |     |
|-----------------------|-----|
| Jennifer Salazar, MBS | USC |
| Yuliana Cabrera, BS   | USC |
| Sarah Walter, MSc     | USC |

|                          |     |
|--------------------------|-----|
| Lindsey Hergesheimen, BS | USC |
|--------------------------|-----|

**San Francisco Veterans Affairs Medical Center**

|                   |                  |
|-------------------|------------------|
| Thomas Neylan, MD | UC San Francisco |
| Jacqueline Hayes  | UC San Francisco |
| Shannon Finley    | UC San Francisco |

**Biostatistics Core Leaders and Key Personnel**

|                      |                    |
|----------------------|--------------------|
| Danielle Harvey, PhD | UC Davis (Core PI) |
| Michael Donohue, PhD | UC San Diego       |

**MRI Core Leaders and Key Personnel**

|                           |                                  |
|---------------------------|----------------------------------|
| Clifford R. Jack, Jr., MD | Mayo Clinic, Rochester (Core PI) |
| Matthew Bernstein, PhD    | Mayo Clinic, Rochester           |
| Bret Borowski, RT         | Mayo Clinic                      |
| Jeff Gunter, PhD          | Mayo Clinic                      |
| Matt Senjem, MS           | Mayo Clinic                      |
| Kejal Kantarci            | Mayo Clinic                      |
| Chad Ward                 | Mayo Clinic                      |

**PET Core Leaders and Key Personnel**

|                       |                              |
|-----------------------|------------------------------|
| William Jagust, MD    | UC Berkeley (Core PI)        |
| Robert A. Koeppe, PhD | University of Michigan       |
| Norm Foster, MD       | University of Utah           |
| Eric M. Reiman, MD    | Banner Alzheimer's Institute |
| Kewei Chen, PhD       | Banner Alzheimer's Institute |
| Susan Landau, PhD     | UC Berkeley                  |

**Neuropathology Core Leaders**

|                               |                                 |
|-------------------------------|---------------------------------|
| John C. Morris, MD            | Washington University St. Louis |
| Nigel J. Cairns, PhD, FRCPath | Washington University St. Louis |
| Erin Householder, MS          | Washington University St. Louis |

**Biomarkers Core Leaders and Key Personnel**

|                             |                                    |
|-----------------------------|------------------------------------|
| Leslie M. Shaw, PhD         | Perelman School of Medicine, UPenn |
| John Q. Trojanowki, MD, PhD | Perelman School of Medicine, UPenn |
| Virginia Lee, PhD, MBA      | Perelman School of Medicine, UPenn |
| Magdalena Korecka, PhD      | Perelman School of Medicine, UPenn |
| Michal Figurski, PhD        | Perelman School of Medicine, UPenn |

**Informatics Core Leaders and Key Personnel**

|                     |               |
|---------------------|---------------|
| Arthur W. Toga, PhD | USC (Core PI) |
| Karen Crawford      | USC           |
| Scott Neu, PhD      | USC           |



## Genetics Core Leaders and Key Personnel

Andrew J. Saykin, PsyD  
Tatiana M. Foroud, PhD

Indiana University  
Indiana University

Steven Potkin, MD UC  
Li Shen, PhD  
Kelley Faber, MS, CCRC  
Sungeun Kim, PhD  
Kwangsik Nho, PhD

UC Irvine  
Indiana University  
Indiana University  
Indiana University  
Indiana University

### Initial Concept Planning & Development

Michael W. Weiner, MD  
Karl Friedl

UC San Francisco  
Department of Defense (retired)

### Part B: Investigators By Site

#### University of Southern California:

Lon S. Schneider, MD, MS  
Sonia Pawluczyk, MD  
Mauricio Becerra

#### University of California, San Diego:

James Brewer, MD, PhD  
Helen Vanderswag, RN

#### Columbia University Medical Center:

Yaakov Stern, PhD  
Lawrence S. Honig, MD, PhD  
Karen L. Bell, MD

#### Rush University Medical Center:

Debra Fleischman, Ph.D.  
Konstantinos Arfanakis, Ph.D.  
Raj C. Shah, M.D.

#### Wien Center:

Dr. Ranjan Duara MD PI  
Dr. Daniel Varon MD Co-PI  
Maria T Greig HP Coordinator

#### Duke University Medical Center:

P. Murali Doraiswamy, MBBS  
Jeffrey R. Petrella, MD  
Olga James, MD

#### University of Rochester Medical Center:

Anton P. Porsteinsson, MD (director)  
Bonnie Goldstein, MS, NP (coordinator)  
Kimberly S. Martin, RN

#### University of California, Irvine:

Steven G. Potkin, MD  
Adrian Preda, MD  
Dana Nguyen, PhD

#### Medical University South Carolina:

Jacobo Mintzer, MD, MBA  
Dino Massoglia, MD, PhD  
Olga Brawman-Mintzer, MD

#### Premiere Research Inst (Palm Beach Neurology):

Carl Sadowsky, MD  
Walter Martinez, MD  
Teresa Villena, MD

#### University of California, San Francisco:

William Jagust MD  
Susan Landau PhD  
Howard Rosen, MD  
David Perry

#### Georgetown University Medical Center:

Raymond Scott Turner, MD, PhD  
Kelly Behan  
Brigid Reynolds, NP

#### Brigham and Women's Hospital:

Reisa A. Sperling, MD  
Keith A. Johnson, MD  
Gad Marshall, MD

#### Banner Sun Health Research Institute:

Marwan N. Sabbagh, MD  
Sandra A. Jacobson, MD



Sherye A. Sirrel, MS, CCRC

**Howard University:**

Thomas O. Obisesan, MD, MPH

Saba Wolday, MSc

Joanne Allard, PhD

**University of Wisconsin:**

Sterling C. Johnson, Ph.D.

J. Jay Fruehling, M.A.

Sandra Harding, M.S.

**University of Washington:**

Elaine R. Peskind, MD

Eric C. Petrie, MD, MS

Gail Li, MD, PhD

**Stanford University:**

Jerome A. Yesavage, MD

Joy L. Taylor, PhD

Ansgar J. Furst, PhD

Steven Chao, M.D.

**Cornell University:**

Norman Relkin, MD, PhD

Gloria Chiang, MD

Lisa Ravdin, PhD

## **ADNI Depression**

### **Part A: Leadership and Infrastructure**

#### **Principal Investigator**

Scott Mackin, PhD University of California, San Francisco

#### **ATRI PI and Director of Coordinating Center Clinical Core**

Paul Aisen, MD University of Southern California  
Rema Raman, PhD University of Southern California

#### **Executive Committee**

Scott Mackin, PhD UC San Francisco  
Michael Weiner, MD UC San Francisco  
Paul Aisen, MD University of Southern California  
Rema Raman, PhD University of Southern California  
Clifford R. Jack, Jr., MD Mayo Clinic, Rochester  
Susan Landau, PhD UC Berkeley  
Andrew J. Saykin, PsyD Indiana University  
Arthur W. Toga, PhD University of Southern California  
Charles DeCarli, MD UC Davis  
Robert A. Koeppe, PhD University of Michigan

#### **Data and Publication Committee (DPC)**

Robert C. Green, MD, MPH BWH/HMS (Chair)  
Erin Drake, MA BWM/HMS (Director)

#### **Clinical Core Leaders**

Michael Weiner MD Core PI  
Paul Aisen, MD University of Southern California  
Rema Raman, PhD University of Southern California  
Mike Donohue, PhD University of Southern California

#### **Clinical Informatics, Operations and Regulatory Affairs**

Gustavo Jimenez, MBS USC  
Devon Gessert, BS USC  
Kelly Harless, BA USC  
Jennifer Salazar, MBS USC  
Yuliana Cabrera, BS USC  
Sarah Walter, MSc USC  
Lindsey Hergesheimer, BS USC  
Elizabeth Shaffer, BS

#### **Psychiatry Site Leaders and Key Personnel**

Scott Mackin, PhD UC San Francisco  
Craig Nelson, MD UC San Francisco  
David Bickford, BA UC San Francisco  
Meryl Butters, PhD University of Pittsburgh  
Michelle Zmuda, MA University of Pittsburgh

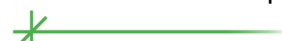

**MRI Core Leaders and Key Personnel**

|                           |                                  |
|---------------------------|----------------------------------|
| Clifford R. Jack, Jr., MD | Mayo Clinic, Rochester (Core PI) |
| Matthew Bernstein, PhD    | Mayo Clinic, Rochester           |
| Bret Borowski, RT         | Mayo Clinic, Rochester           |
| Jeff Gunter, PhD          | Mayo Clinic, Rochester           |
| Matt Senjem, MS           | Mayo Clinic, Rochester           |
| Kejal Kantarci, MD        | Mayo Clinic, Rochester           |
| Chad Ward, BA             | Mayo Clinic, Rochester           |
| Denise Reyes, BS          | Mayo Clinic, Rochester           |

**PET Core Leaders and Key Personnel**

|                       |                        |
|-----------------------|------------------------|
| Robert A. Koeppe, PhD | University of Michigan |
| Susan Landau, PhD     | UC Berkeley            |

**Informatics Core Leaders and Key Personnel**

|                     |               |
|---------------------|---------------|
| Arthur W. Toga, PhD | USC (Core PI) |
| Karen Crawford      | USC           |
| Scott Neu, PhD      | USC           |

**Genetics Core Leaders and Key Personnel**

|                           |                    |
|---------------------------|--------------------|
| Andrew J. Saykin, PsyD    | Indiana University |
| Tatiana M. Foroud, PhD    | Indiana University |
| Kelley M. Faber, MS, CCRC | Indiana University |
| Kwangsik Nho, PhD         | Indiana University |
| Kelly N. Nudelman         | Indiana University |

**Part B: Investigators By Site****University of California, San Francisco:**

Scott Mackin, PhD  
Howard Rosen, MD  
Craig Nelson, MD  
David Bickford, BA  
Yiu Ho Au, BA  
Kelly Scherer, BS  
Daniel Catalinotto, BA  
Samuel Stark, BA  
Elise Ong, BA  
Dariella Fernandez, BA

**University of Pittsburgh:**

Meryl Butters, PhD  
Michelle Zmuda, MA  
Oscar L. Lopez, MD  
MaryAnn Oakley, MA  
Donna M. Simpson, CRNP, MPH



Supplement: ACN3-8-29-s002.pdf [file ACN3-8-29-s002.pdf]
